# Supplementary material
Source: PubMed Central journal article supplement (PMC2799690)
Supplement: 0908284106_0908284106SI.pdf [file 0908284106_0908284106SI.pdf]

# Supporting Information

Galand et al. 10.1073/pnas.0908284106

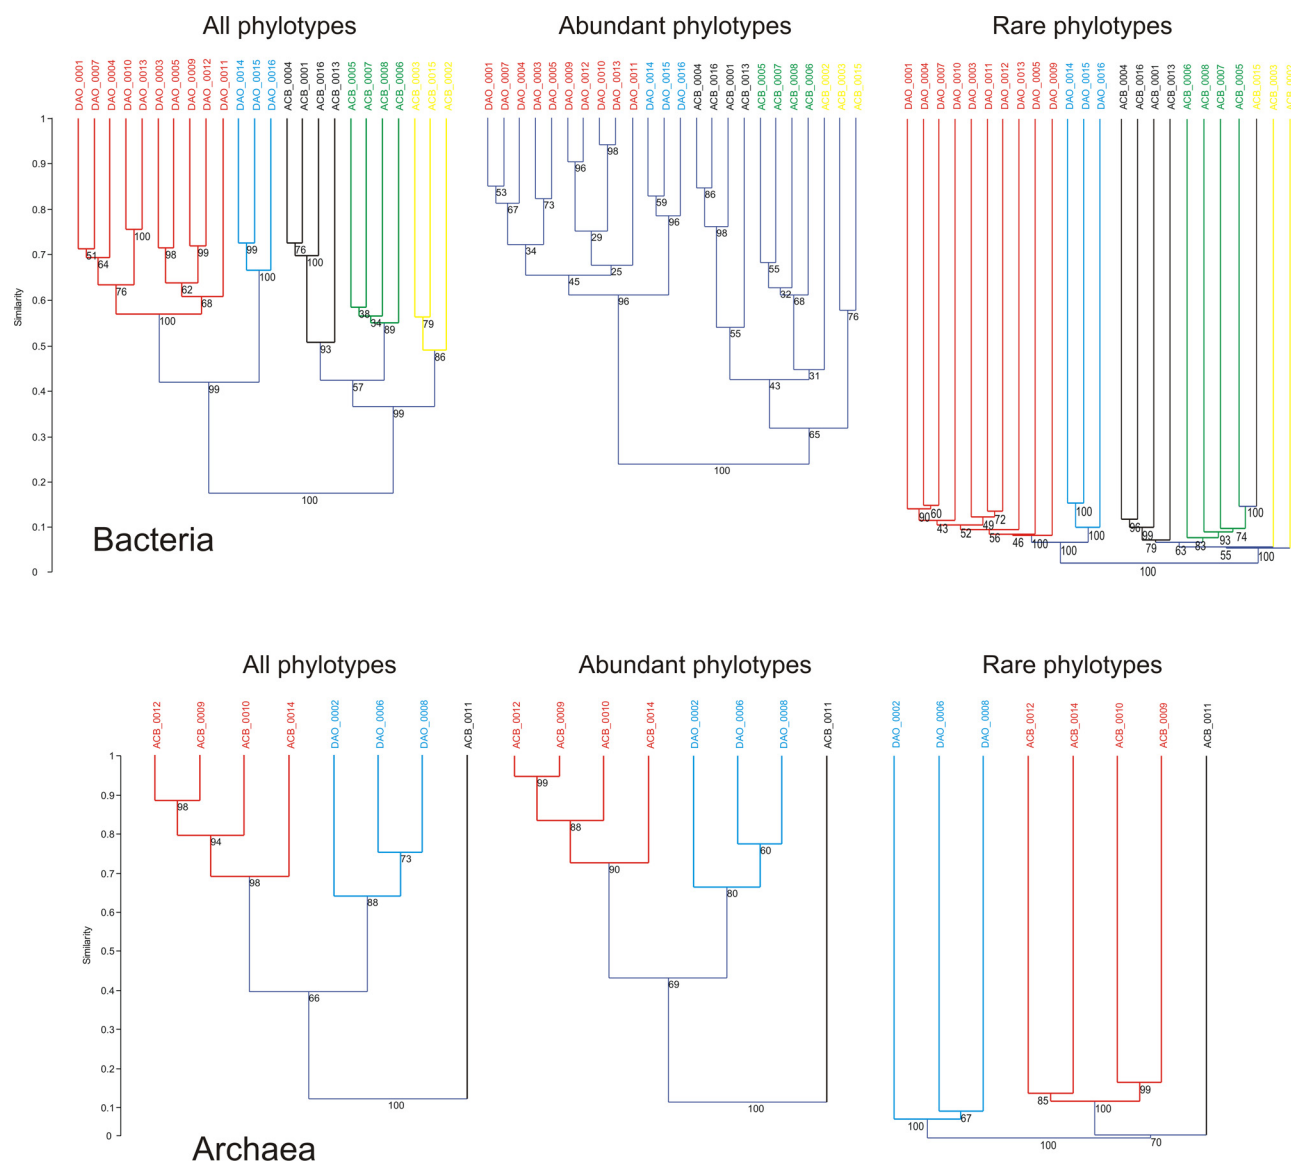

**Fig. S1.** Dendrograms representing the similarity between the composition of 24 bacterial communities from deep (DAO) and surface (ACB) water masses of the Arctic Ocean. Phylotypes are defined as single sequence identity level (100% identity between sequences). The clustering pattern including all phylotypes is compared with the clustering for abundant phylotypes only (frequency > 1%) and for rare phylotypes only (< 0.01%). Colors highlight the clusters conserved through the three analyses.



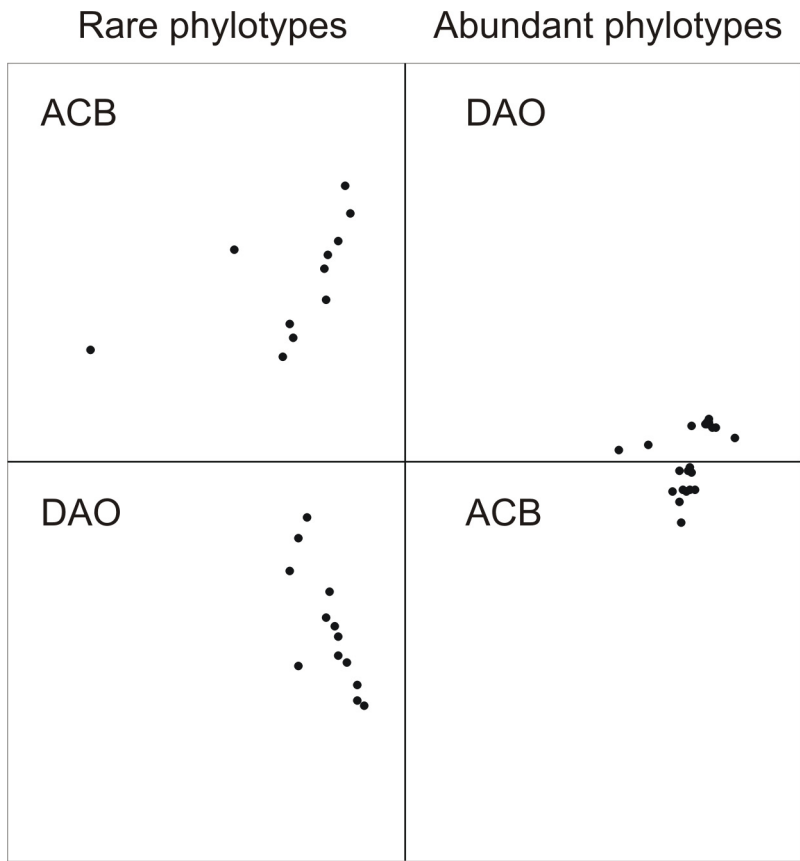

**Fig. S3.** Nonmetric multidimensional scaling analysis of the phylotype composition of the abundant (>1%) and rare (<0.01%) bacterial biosphere ( $n = 48$ ). Phylotypes are defined as grouping sequences with 100% identity. Calculated stress for this analysis using Bray–Curtis similarity = 0.204.



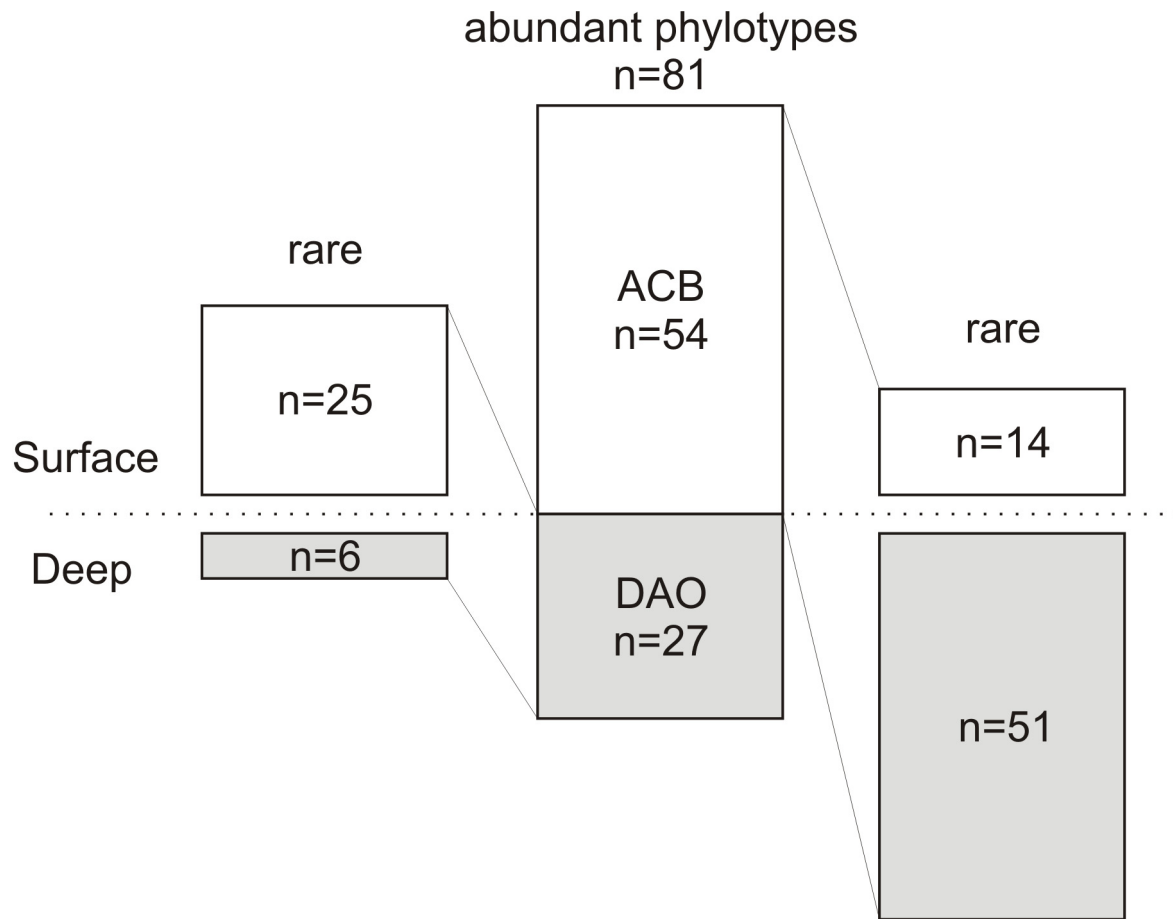

**Fig. S5.** Schematic showing the distribution between surface and deep waters of the 81 bacterial phylotypes found abundant in some communities and rare in others. Phylotypes comprised all sequences having a best match to the same reference sequences.

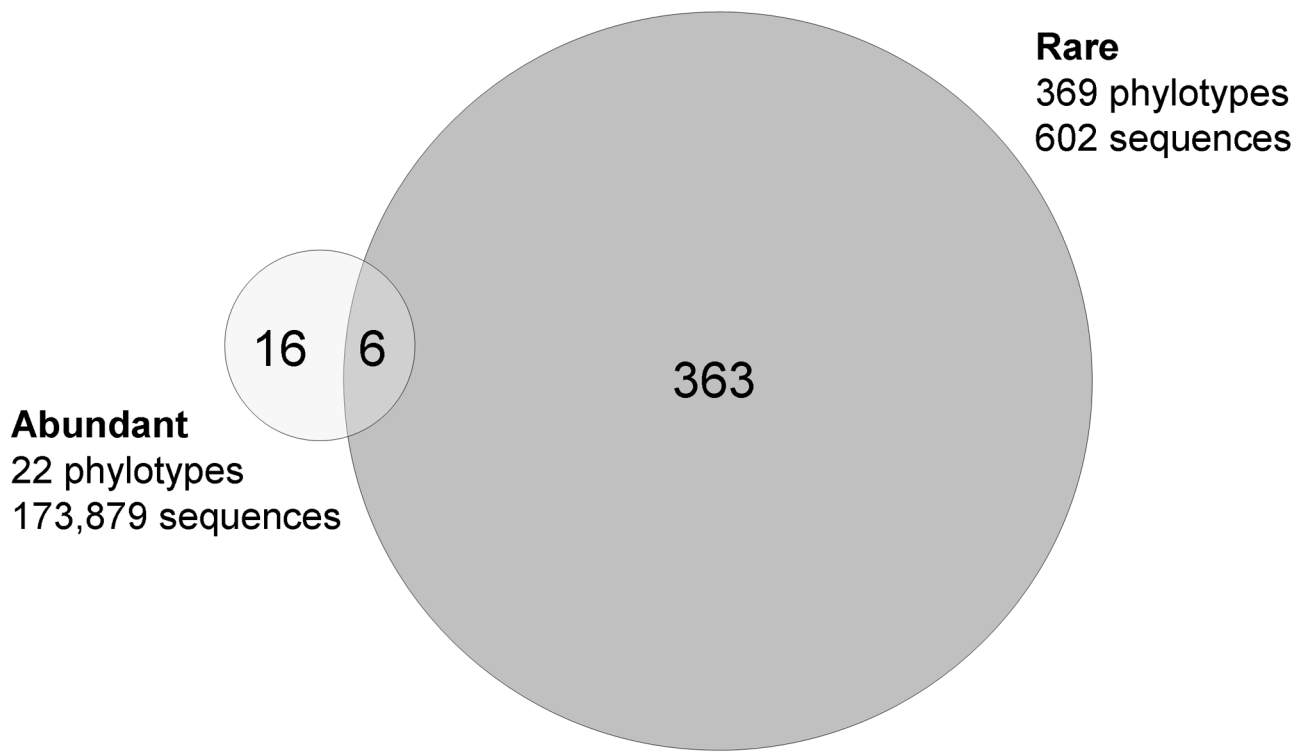

Fig. S6. Venn diagram illustrating the number of archaea phylotypes being rare in all samples (dark gray) vs. phylotypes being rare in some samples but abundant in others (overlap area) and phylotypes always abundant and never rare (white area).

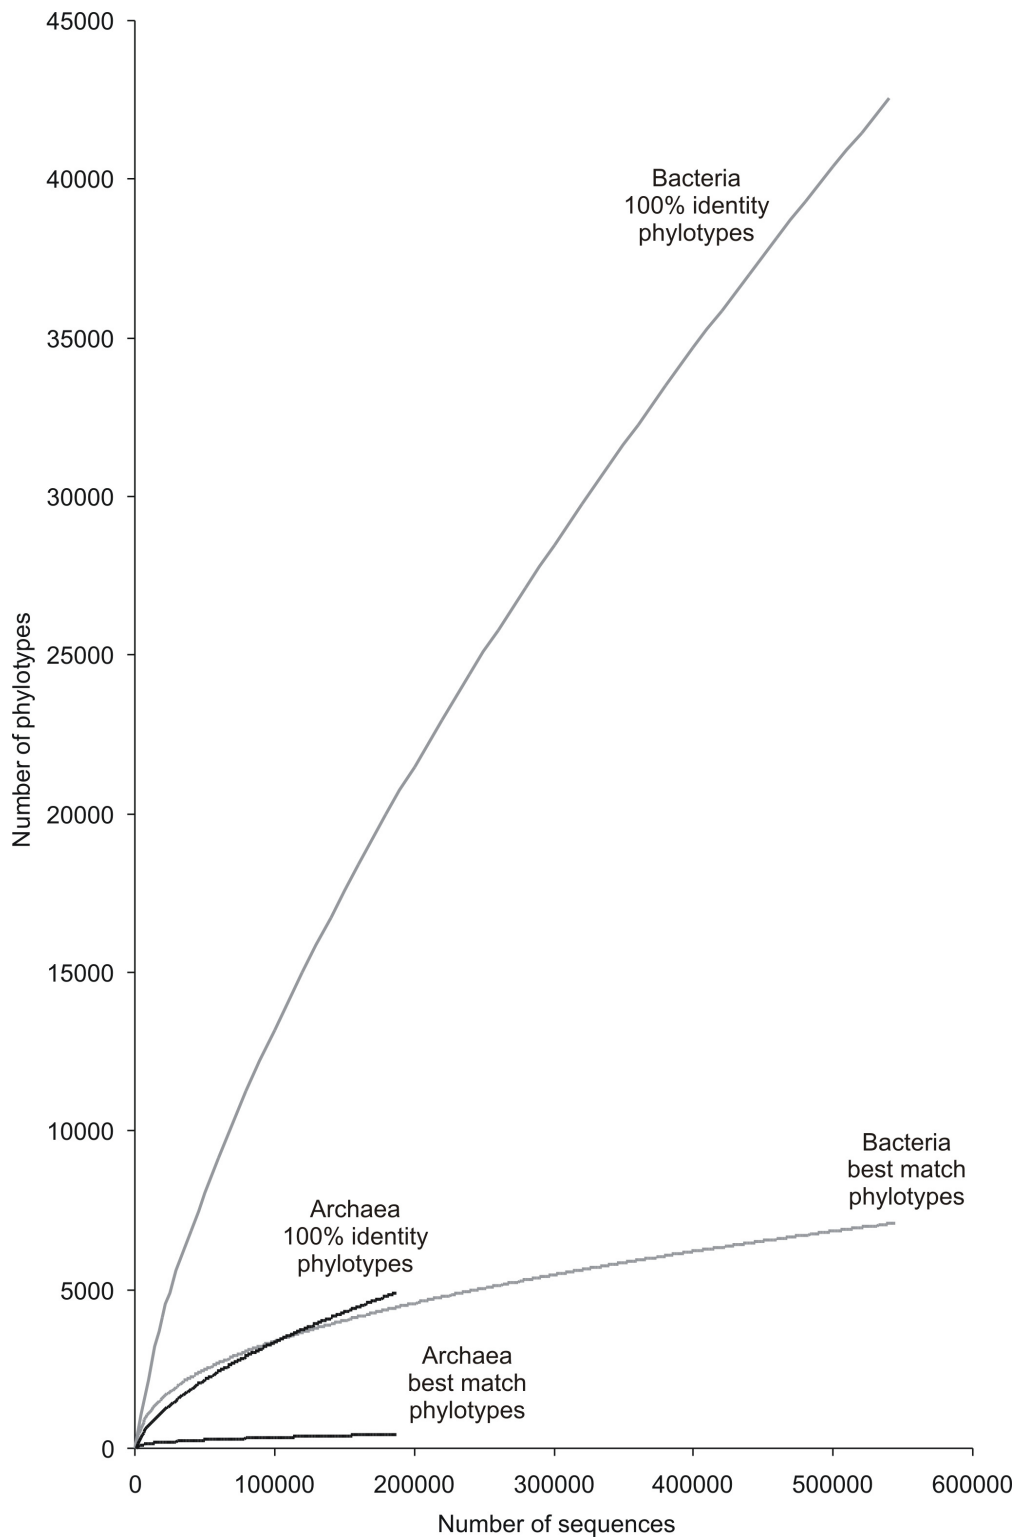

**Fig. S7.** Rarefaction curves for archaea and bacteria for all samples grouped together. The figure illustrates the four different level of diversity used in our ecological study of the rare marine biosphere. Rarefaction was calculated for two different levels of phylotype definition. For the 100% identity definition, all sequences with 100% identity were grouped as a same phylotype. For the best-match definition, all sequences with the same best match to a sequence from the reference database were grouped together.

**Table S1. Sample information for 32 bacterial and archaeal communities from the Arctic Ocean**

| Sample ID | Domain   | Date       | Lat. °N | Long. °W | Depth | Region           | Temp. | Salinity | No. sequences |
|-----------|----------|------------|---------|----------|-------|------------------|-------|----------|---------------|
| ACB_0001  | Bacteria | 13/07/2007 | 71.45   | -156.06  | 2     | Coastal Beaufort | 2.5   | 20.0     | 17,254        |
| ACB_0002  | Bacteria | 11/07/2007 | 71.43   | -156.86  | 2     | Coastal Chukchi  | 4.6   | 32.0     | 9,849         |
| ACB_0003  | Bacteria | 26/01/2007 | 71.35   | -156.68  | 2     | Coastal Chukchi  | -1.8  | 35.0     | 19,376        |
| ACB_0004  | Bacteria | 30/01/2008 | 71.35   | -156.68  | 2     | Coastal Chukchi  | -2.0  | 35.0     | 21,064        |
| ACB_0005  | Bacteria | 29/07/2002 | 72.32   | -151.98  | 10    | Beaufort Sea     | -1.5  | 29.4     | 22,575        |
| ACB_0006  | Bacteria | 06/08/2002 | 72.24   | -159.34  | 10    | Chukchi Sea      | -1.1  | 29.5     | 17,330        |
| ACB_0007  | Bacteria | 30/07/2004 | 71.54   | -150.89  | 8.4   | Beaufort Sea     | 5.2   | 29.9     | 19,267        |
| ACB_0008  | Bacteria | 21/08/2004 | 72.42   | -152.02  | 39.7  | Beaufort Sea     | -1.2  | 30.3     | 15,875        |
| ACB_0009  | Archaea  | 13/07/2007 | 71.45   | -156.06  | 2     | Coastal Beaufort | 2.5   | 20.0     | 27,836        |
| ACB_0010  | Archaea  | 30/01/2008 | 71.35   | -156.68  | 2     | Coastal Chukchi  | -1.8  | 35.0     | 29,088        |
| ACB_0011  | Archaea  | 30/07/2004 | 71.54   | -150.89  | 8.4   | Beaufort Sea     | 5.2   | 29.9     | 20,867        |
| ACB_0012  | Archaea  | 28/01/2008 | 71.35   | -156.68  | 2     | Coastal Chukchi  | -1.8  | 35.0     | 33,152        |
| ACB_0013  | Bacteria | 17/01/2004 | 70.04   | -126.30  | 3     | Franklin Bay     | -1.6  | 29.8     | 13,604        |
| ACB_0014  | Archaea  | 17/01/2004 | 70.04   | -126.30  | 3     | Franklin Bay     | -1.6  | 29.8     | 29,449        |
| ACB_0015  | Bacteria | 16/07/2004 | 70.05   | -126.31  | 1.5   | Franklin Bay     | 4.0   | 29.0     | 54,548        |
| ACB_0016  | Bacteria | 28/01/2008 | 71.35   | -156.68  | 2     | Coastal Chukchi  | -1.8  | 35.0     | 20,677        |
| DAO_0001  | Bacteria | 12/07/2007 | 68.83   | -61.76   | 1000  | Baffin Bay       | 0.9   | 34.5     | 28,762        |
| DAO_0002  | Archaea  | 12/07/2007 | 68.83   | -61.76   | 1000  | Baffin Bay       | 0.9   | 34.5     | 18,780        |
| DAO_0003  | Bacteria | 04/08/2007 | 71.96   | -150.23  | 1000  | Beaufort Sea     | 0.0   | 34.9     | 20,160        |
| DAO_0004  | Bacteria | 04/08/2007 | 71.96   | -150.23  | 395   | Beaufort Sea     | 0.8   | 34.8     | 26,293        |
| DAO_0005  | Bacteria | 12/08/2007 | 79.99   | -149.99  | 1000  | Beaufort Sea     | 0.0   | 34.9     | 18,894        |
| DAO_0006  | Archaea  | 12/08/2007 | 79.99   | -149.99  | 1000  | Beaufort Sea     | 0.0   | 34.9     | 16,194        |
| DAO_0007  | Bacteria | 12/08/2007 | 79.99   | -149.99  | 410   | Beaufort Sea     | 0.9   | 34.8     | 33,191        |
| DAO_0008  | Archaea  | 12/08/2007 | 79.99   | -149.99  | 410   | Beaufort Sea     | 0.9   | 34.8     | 19,741        |
| DAO_0009  | Bacteria | 15/08/2007 | 77.00   | -140.19  | 1000  | Beaufort Sea     | 0.0   | 34.9     | 15,400        |
| DAO_0010  | Bacteria | 15/08/2007 | 77.00   | -140.19  | 400   | Beaufort Sea     | 0.9   | 34.8     | 21,740        |
| DAO_0011  | Bacteria | 20/08/2007 | 75.84   | -128.64  | 900   | Beaufort Sea     | 0.1   | 34.9     | 22,816        |
| DAO_0012  | Bacteria | 23/08/2007 | 73.97   | -140.09  | 1000  | Beaufort Sea     | 0.0   | 34.9     | 24,270        |
| DAO_0013  | Bacteria | 23/08/2007 | 73.97   | -140.09  | 428   | Beaufort Sea     | 0.7   | 34.8     | 17,721        |
| DAO_0014  | Bacteria | 18/09/2007 | 77.75   | 126.00   | 996   | Laptev Sea       | 0.0   | 34.9     | 39,353        |
| DAO_0015  | Bacteria | 21/09/2007 | 79.94   | 142.39   | 1191  | Laptev Sea       | -0.3  | 34.9     | 28,455        |
| DAO_0016  | Bacteria | 21/09/2007 | 79.94   | 142.39   | 252   | Laptev Sea       | 1.4   | 34.8     | 16,772        |

Lat., latitude; Long., longitude, Temp. temperature.
